# Supplementary material for: Restoring the impaired cardiac calcium homeostasis and cardiac function in iron overload rats by the combined deferiprone and N-acetyl cysteine
Source: Sci Rep. 2017 Mar 13;7:44460. doi: 10.1038/srep44460 (PMC5347387; doi:10.1038/srep44460)
Supplement: Supplementary Information [file srep44460-s1.pdf]

## **Supplementary Information file**

**Title:** Restoring the impaired cardiac calcium homeostasis and cardiac function in iron overload rats by the combined deferiprone and N-acetyl cysteine

**Authors:** Suwakon Wongjaikam, Sirinart Kumfu, Juthamas Khamseekaew, Siriporn C. Chattipakorn, and Nipon Chattipakorn\*

## **Supplementary Methods**

**Determination of non-transferrin bound iron (NTBI) level.** The levels of plasma NTBI was measured using nitrilotriacetic acid disodium salt (NTA) chelation/flow cytometry <sup>1,2</sup> with some modifications for determining free iron in plasma of all rats in each group. Plasma NTBI was performed according to the method described previously <sup>3</sup>.

**Determination of malondialdehyde (MDA) level.** The levels of plasma and cardiac MDA were measured using the high-performance liquid chromatography (HPLC) method <sup>4</sup> for assessing systemic and cardiac oxidative stress in iron overload rats in each group. Plasma and cardiac MDA concentration were performed according to the method described previously <sup>3</sup>.

**Determination of cardiac iron concentration.** Cardiac iron concentration was measured using a colorimetric method <sup>5,6</sup> for determining non-heme iron in heart tissues of rats in each group. Cardiac iron concentration was performed according to the method described previously <sup>3</sup>.

## References

1. Singh, S., Hider, R.C. & Porter, J.B. A direct method for quantification of non-transferrin-bound iron. *Analytical biochemistry* **186**, 320-323 (1990).
2. Ma, Y., *et al.* A novel method for non-transferrin-bound iron quantification by chelatable fluorescent beads based on flow cytometry. *The Biochemical journal* **463**, 351-362 (2014).
3. Wongjaikam, S., *et al.* Combined Iron Chelator and Antioxidant Exerted Greater Efficacy on Cardioprotection Than Monotherapy in Iron-Overloaded Rats. *PloS one* **11**, e0159414 (2016).
4. Grotto, D., *et al.* Rapid quantification of malondialdehyde in plasma by high performance liquid chromatography-visible detection. *Journal of pharmaceutical and biomedical analysis* **43**, 619-624 (2007).
5. Rebouche, C.J., Wilcox, C.L. & Widness, J.A. Microanalysis of non-heme iron in animal tissues. *Journal of biochemical and biophysical methods* **58**, 239-251 (2004).
6. Kumfu, S., Chattipakorn, S., Chinda, K., Fucharoen, S. & Chattipakorn, N. T-type calcium channel blockade improves survival and cardiovascular function in thalassemic mice. *European journal of haematology* **88**, 535-548 (2012).

**Supplementary Table 1.** Effects of all pharmacological interventions on iron status in iron-overloaded rats.

| Iron status                                | ND        | HFeV         | HFeDFO          | HFeDFP          | HFeDFX          | HFeNAC          | HFeDFP+NAC   |
|--------------------------------------------|-----------|--------------|-----------------|-----------------|-----------------|-----------------|--------------|
| Plasma NTBI level (μM)                     | 0.00±0.00 | 0.61±0.12*   | 0.28±0.07*,†    | 0.36±0.06*,†    | 0.35±0.05*,†    | 0.38±0.06*,†    | 0.31±0.05*,† |
| Plasma MDA level (μM)                      | 1.85±0.23 | 14.84±1.91*  | 8.47±1.28*,†    | 9.08±1.00*,†    | 10.23±0.61*,†   | 8.86±1.00*,†    | 8.72±1.14*,† |
| Cardiac iron concentration (μM/mg protein) | 8.04±0.47 | 48.00±7.91*  | 23.68±1.34*,†,‡ | 23.58±1.24*,†,‡ | 24.43±1.16*,†,‡ | 25.69±2.08*,†,‡ | 14.23±2.10†  |
| Cardiac MDA concentration (μM/mg protein)  | 3.39±0.96 | 39.20±11.97* | 20.55±3.34*,†,‡ | 20.31±5.44*,†,‡ | 20.62±6.15*,†,‡ | 5.11±1.08†      | 3.85±0.76†   |

MDA=malondialdehyde; \* $P < 0.05$  vs. ND control, † $P < 0.05$  vs. HFeV, ‡ $P < 0.05$  vs. HFeDFP+NAC.

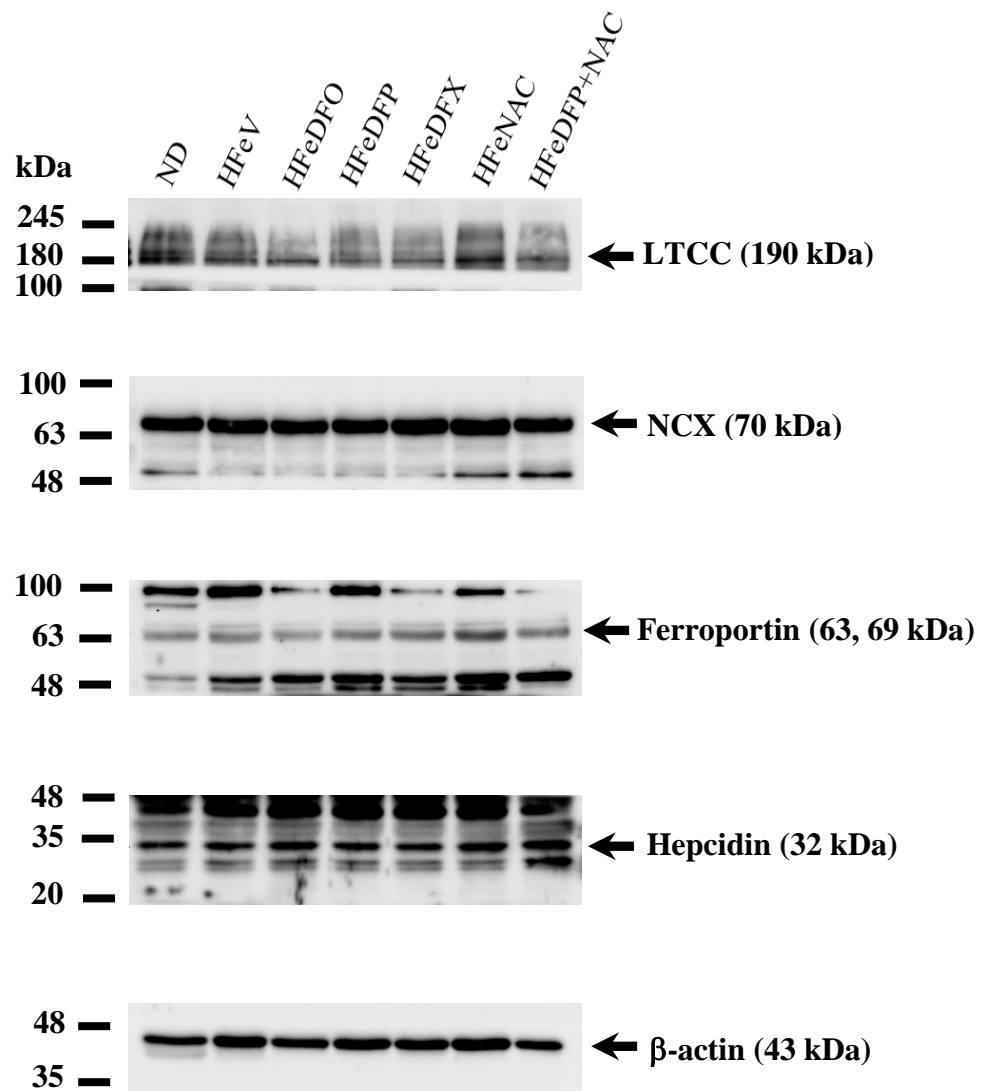

**Supplementary Figure 1. Full-length blots of data shown in Fig. 3a,d and 4c,d.**

The gels were initially cut ranged from 20 kDa to 245 kDa.

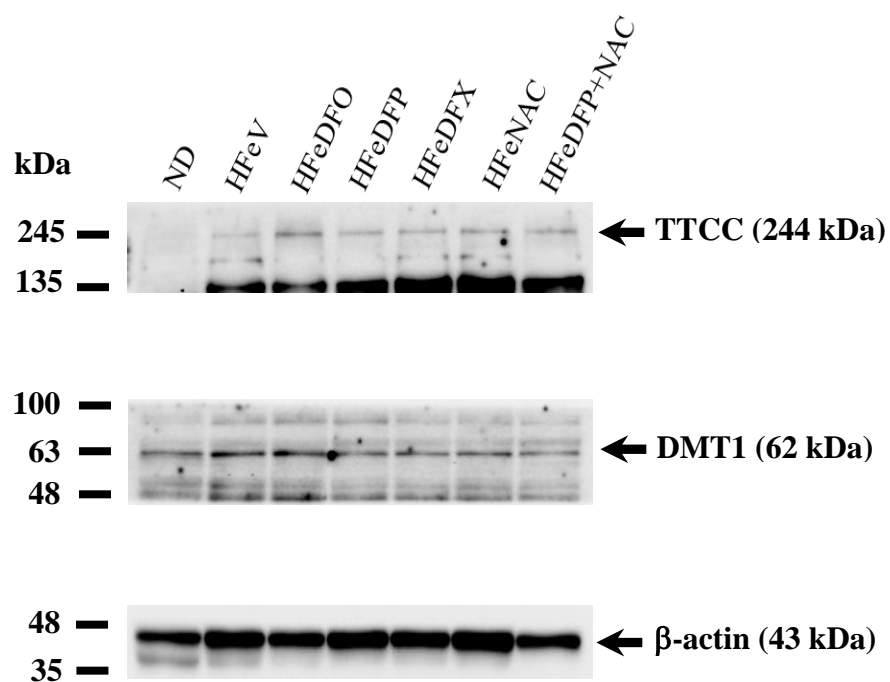

**Supplementary Figure 2. Full-length blots of data shown in Fig. 3b and 4a.**

The gels were initially cut ranged from 35 kDa to 245 kDa.

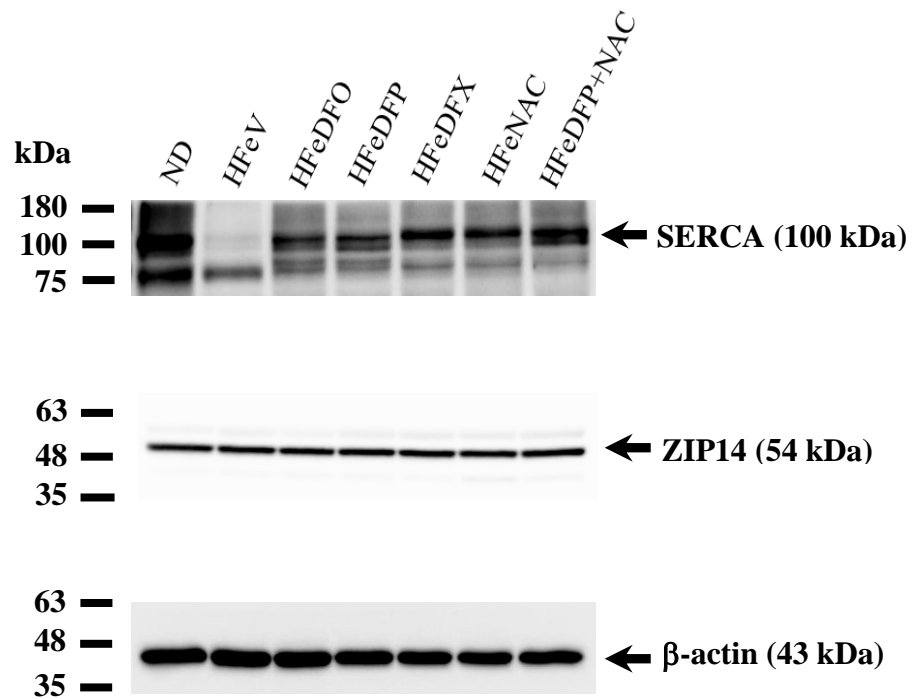

**Supplementary Figure 3. Full-length blots of data shown in Fig. 3c and 4b.**

The gels were initially cut ranged from 35 kDa to 180 kDa.
